# Supplementary material for: Newborn micronutrient status biomarkers in a cluster-randomized trial of antenatal multiple micronutrient compared with iron folic acid supplementation in rural Bangladesh
Source: PubMed Central journal article supplement (PMC7657323; doi:10.1093/ajcn/nqaa223), 2020-08-25
Supplement: nqaa223_supplemental_file.pdf [file nqaa223_supplemental_file.pdf]

ONLINE SUPPLEMENTARY MATERIAL

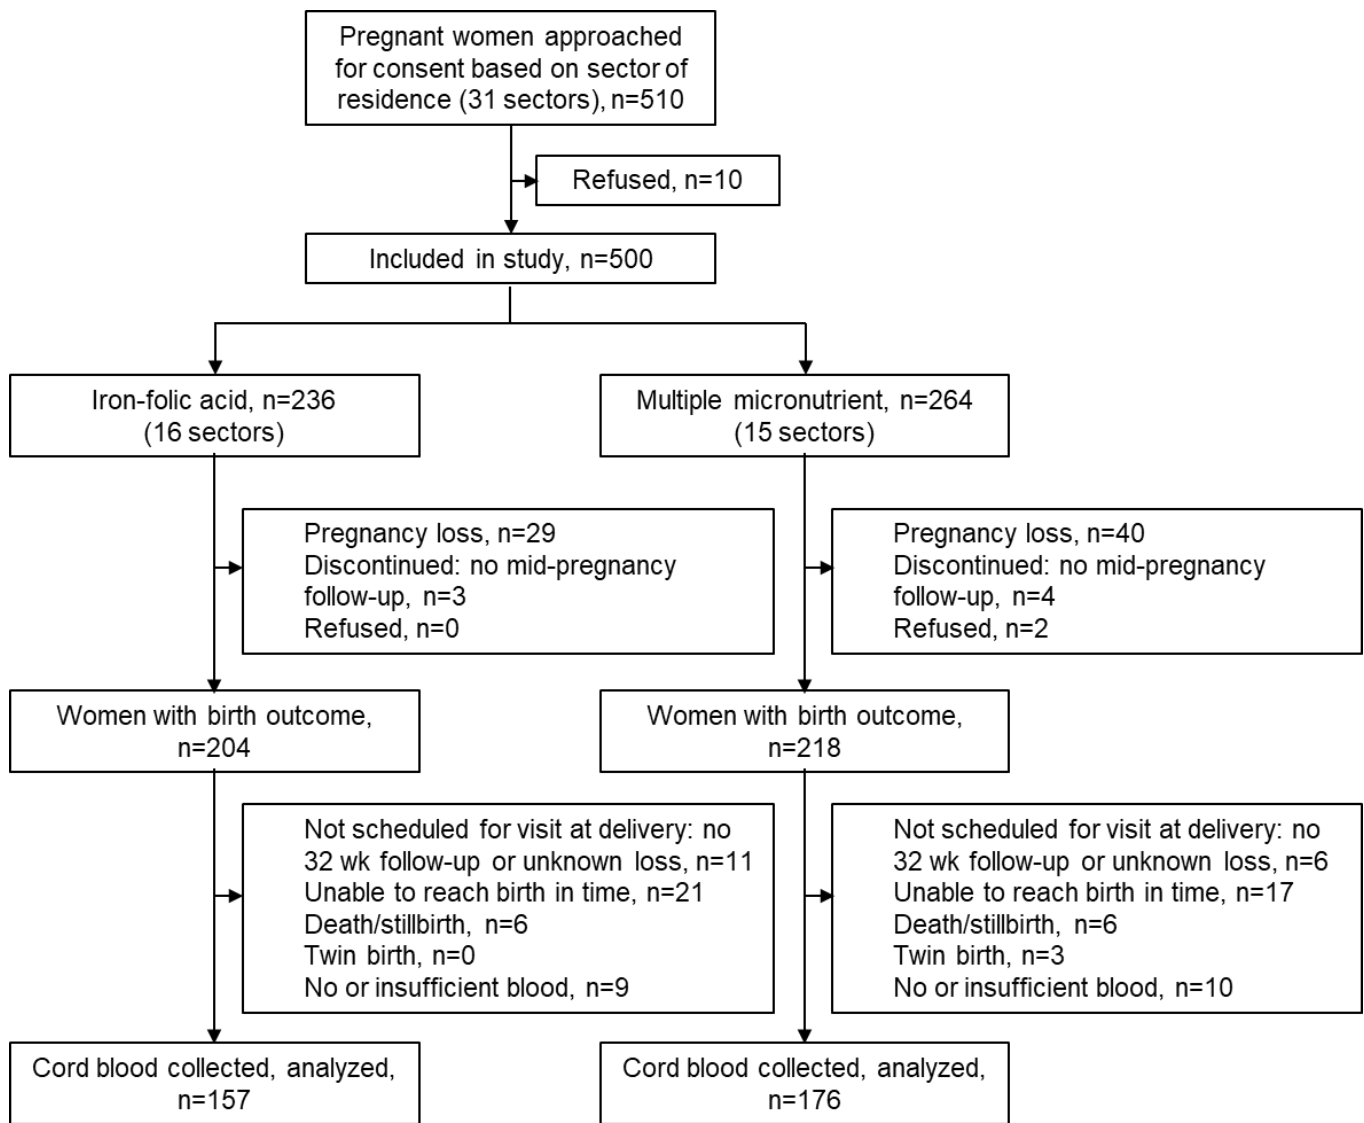

Supplementary Figure 1. Consolidated Standards of Reporting Trials diagram depicting source of cord blood samples for analysis of micronutrient biomarkers in Bangladeshi infants.

## ONLINE SUPPLEMENTARY MATERIAL

Supplementary Table 1. Maternal micronutrient and inflammation biomarkers at 32 wk gestation by intervention status among the subset of mothers from the JiVitA-3 trial substudy in rural Bangladesh from whom cord blood was collected at the time of delivery

| Nutrient     | Biomarker                               | IFA |                         | MM  |                         | P-value |
|--------------|-----------------------------------------|-----|-------------------------|-----|-------------------------|---------|
|              |                                         | N   | Biomarker concentration | N   | Biomarker concentration |         |
| Iron         | Ferritin, $\mu\text{g/L}$               | 152 | 32 (15, 68)             | 165 | 33 (16, 65)             | 0.821   |
| Folate       | Total plasma folate, nmol/L             | 155 | 27 (13, 57)             | 174 | 25 (12, 52)             | 0.425   |
| Vitamin B-12 | Cobalamin, pmol/L                       | 154 | 157 (107, 230)          | 174 | 168 (119, 236)          | 0.182   |
| Vitamin A    | Retinol, $\mu\text{mol/L}$              | 133 | 0.94 $\pm$ 0.32         | 146 | 1.04 $\pm$ 0.31         | 0.011   |
| Vitamin D    | 25(OH)D, nmol/L                         | 156 | 46 (35, 61)             | 174 | 52 (38, 71)             | 0.005   |
| Vitamin E    | $\alpha$ -Tocopherol, $\mu\text{mol/L}$ | 133 | 19.0 $\pm$ 5.3          | 146 | 20.7 $\pm$ 4.9          | 0.009   |
| Zinc         | Total plasma zinc, $\mu\text{mol/L}$    | 155 | 14.3 (11.7, 17.5)       | 176 | 15.2 (12.6, 18.4)       | 0.023   |
| Iodine       | Thyroglobulin, $\mu\text{g/L}$          | 149 | 35.3 (16.2, 77.2)       | 170 | 35.2 (18.6, 66.5)       | 0.475   |
|              | fT4, pmol/L                             | 149 | 15.3 $\pm$ 1.7          | 171 | 15.2 $\pm$ 1.6          | 0.883   |
| Inflammation | AGP, g/L                                | 155 | 0.56 (0.38, 0.82)       | 174 | 0.54 (0.40, 0.74)       | 0.316   |

<sup>1</sup>Biomarker concentrations are geometric means (-1SD, +1SD) or mean $\pm$ SD. Differences calculated from regression with biomarker or log<sub>10</sub>-biomarker as outcome, intervention as independent variable, and robust standard errors to account for cluster randomization. Conversion of biomarkers to other commonly used units can be done as follows: folate nmol/L x 0.4413 to ng/mL, B-12 pmol/L x 1.355 to pg/mL, retinol  $\mu\text{mol/L}$  x 28.65 to  $\mu\text{g/dL}$ , 25(OH)D pmol/L x 0.4006 to ng/mL,  $\alpha$ -tocopherol  $\mu\text{mol/L}$  x 0.423 to  $\mu\text{g/mL}$ , zinc  $\mu\text{mol/L}$  x 6.534 to  $\mu\text{g/dL}$ , fT4 pmol/L x 0.0777 to ng/dL. AGP,  $\alpha$ 1-acid glycoprotein; fT4, free thyroxine; IFA, iron folic acid; MM, multiple micronutrients; 25(OH)D, 25-hydroxyvitamin D.

ONLINE SUPPLEMENTARY MATERIAL

Supplementary Table 2. Distributions of newborn (cord blood plasma) micronutrient status and inflammation biomarkers among participants in the JiVitA-3 trial in rural Bangladesh<sup>1</sup>

| Biomarker               | N   | Mean±SD   | Geometric mean<br>(-1SD, 1SD) | Selected percentiles |                  |                  |                  |                  |                  |                  |
|-------------------------|-----|-----------|-------------------------------|----------------------|------------------|------------------|------------------|------------------|------------------|------------------|
|                         |     |           |                               | 1 <sup>st</sup>      | 10 <sup>th</sup> | 25 <sup>th</sup> | 50 <sup>th</sup> | 75 <sup>th</sup> | 90 <sup>th</sup> | 99 <sup>th</sup> |
| Ferritin, µg/L          | 320 | 189±159   | 151 (76, 301)                 | 44                   | 70               | 110              | 158              | 223              | 311              | 900              |
| Folate, nmol/L          | 332 | 65±32     | 58 (37, 93)                   | 23                   | 33               | 40               | 57               | 80               | 104              | 169              |
| Cobalamin, pmol/L       | 331 | 345±193   | 298 (175, 509)                | 112                  | 154              | 193              | 275              | 457              | 663              | 836              |
| Retinol, µmol/L         | 282 | 0.64±0.23 | 0.60 (0.41, 0.88)             | 0.16                 | 0.38             | 0.50             | 0.61             | 0.75             | 0.93             | 1.40             |
| 25(OH)D, nmol/L         | 333 | 44±16     | 41 (29, 59)                   | 18                   | 27               | 33               | 41               | 53               | 66               | 91               |
| α-Tocopherol,<br>µmol/L | 282 | 6.0±2.0   | 5.6 (3.9, 8.1)                | 1.9                  | 3.5              | 4.6              | 5.8              | 7.2              | 8.7              | 12.0             |
| Zinc, µmol/L            | 331 | 15.1±3.1  | 14.8 (12.1, 18.0)             | 9.7                  | 11.7             | 12.9             | 14.9             | 16.9             | 18.6             | 26.1             |
| Thyroglobulin, µg/L     | 319 | 43.9±28.8 | 35.2 (17.4, 71.5)             | 5.9                  | 15.5             | 22.3             | 39.0             | 57.5             | 80.5             | 143.0            |
| ft4, pmol/L             | 320 | 15.2±1.6  | 15.1 (13.6, 16.9)             | 11.7                 | 13.3             | 14.2             | 15.2             | 16.2             | 17.2             | 20.5             |
| AGP, g/L                | 322 | 0.23±0.11 | 0.21 (0.13, 0.34)             | 0.05                 | 0.11             | 0.15             | 0.21             | 0.29             | 0.37             | 0.60             |

<sup>1</sup> Conversion of biomarkers to other commonly used units can be done as follows: folate nmol/L x 0.4413 to ng/mL, cobalamin pmol/L x 1.355 to pg/mL, retinol µmol/L x 28.65 to µg/dL, 25(OH)D pmol/L x 0.4006 to ng/mL, α-tocopherol µmol/L x 0.423 to µg/mL, zinc µmol/L x 6.534 to µg/dL, ft4 pmol/L x 0.0777 to ng/dL. AGP, α1-acid glycoprotein; ft4, free thyroxine; IFA, iron folic acid; MM, multiple micronutrients; 25(OH)D, 25-hydroxyvitamin D.

## ONLINE SUPPLEMENTARY MATERIAL

Supplementary Table 3. Output for analysis to determine to effect of maternal micronutrient status in mediating the impact of MM versus IFA on improved newborn status among Bangladeshi infants<sup>1</sup>

| Cord blood biomarker | n   | Regression model 1 <sup>2</sup> |                                | Regression model 2 <sup>3</sup>   |                                | Mediation analysis output <sup>4</sup> |                       |                                     |
|----------------------|-----|---------------------------------|--------------------------------|-----------------------------------|--------------------------------|----------------------------------------|-----------------------|-------------------------------------|
|                      |     | Intervention on maternal status | Intervention on newborn status | Maternal status on newborn status | Average causal mediated effect | Direct effect                          | Total effect          | Proportion of total effect mediated |
|                      |     | $\beta$ (95%CI)                 | $\beta$ (95%CI)                | $\beta$ (95%CI)                   | Mean (95%CI)                   | Mean (95%CI)                           | Mean (95%CI)          | Mean (95%CI)                        |
| 25(OH)D, nmol/L      | 326 | 0.374 (0.119, 0.629)*           | 0.022 (-0.007, 0.052)          | 0.101 (0.088, 0.113)**            | 0.038 (0.011, 0.064)*          | 0.022 (-0.008, 0.049)                  | 0.060 (0.021, 0.098)* | 0.624 (0.386, 1.797)*               |
| Zinc, $\mu$ mol/L    | 330 | 0.330 (0.048, 0.612)*           | 0.022 (0.002, 0.042)*          | 0.008 (0.000, 0.016)*             | 0.003 (-0.000, 0.007)          | 0.022 (0.001, 0.040)                   | 0.024 (0.004, 0.043)  | 0.113 (0.062, 0.505)*               |

<sup>1</sup>Based on “medeff” command in Stata (references 17-19), to determine the extent to which the impact of the MM versus IFA supplement was mediated via the impact of the intervention on maternal micronutrient status, accounting for robust standard errors. IFA, iron folic acid; MM, multiple micronutrients; 25(OH)D, 25-hydroxyvitamin D.

<sup>2</sup>Regression model of intervention effect on maternal status equivalent to test shown in Supplementary Table 1. \*P<0.05, \*\*P<0.0001.

<sup>3</sup>Maternal and newborn biomarker data were log<sub>10</sub>-transformed for all biomarkers except retinol,  $\alpha$ -tocopherol, and fT4; all maternal biomarker data was standardized. \*P<0.05, \*\*P<0.0001.

<sup>4</sup>“Average causal mediated effect” describes the strength of the effect of the MM intervention on cord blood biomarkers mediated through maternal biomarker status; “Direct effect” describes the direct impact of the MM versus IFA intervention on cord blood biomarkers; “Total effect” describes the combined direct and mediated effects of the MM versus IFA intervention on cord blood biomarkers; “Proportion of total effect mediated” is estimated from the average causal mediated effect relative to the total effect. Values where 95%CI do not overlap zero are denoted with \*, although no P-value is established for these estimates.

ONLINE SUPPLEMENTARY MATERIAL

Supplementary Table 4. Additional regression models with variables with significant associations with newborn micronutrient biomarker concentrations from the JiVitA-3 trial in rural Bangladesh

| Newborn Biomarkers (outcomes)            | Model | Independent Variables <sup>1</sup>    | $\beta$ -coefficient (95%CI) | <i>P</i> -value | n   | <i>R</i> <sup>2</sup> | Prob>F |
|------------------------------------------|-------|---------------------------------------|------------------------------|-----------------|-----|-----------------------|--------|
| Retinol <sup>3</sup> , $\mu\text{mol/L}$ | 1     | Intervention (MM vs IFA)              | 0.032 (-0.029, 0.092)        | 0.295           | 277 | 0.1019                | 0.0001 |
|                                          |       | Maternal biomarker                    | 0.016 (-0.007, 0.039)        | 0.169           |     |                       |        |
|                                          |       | Weight-for-age Z-score at birth       | 0.070 (0.041, 0.099)         | <0.0001         |     |                       |        |
|                                          | 2     | Intervention (MM vs IFA)              | 0.029 (-0.033, 0.092)        | 0.346           | 276 | 0.0377                | 0.0179 |
|                                          |       | Maternal biomarker                    | 0.019 (-0.006, 0.045)        | 0.133           |     |                       |        |
|                                          |       | Length-for-age Z-score at birth       | 0.034 (0.007, 0.062)         | 0.016           |     |                       |        |
|                                          | 3     | Intervention (MM vs IFA)              | 0.010 (-0.050, 0.069)        | 0.738           | 248 | 0.0767                | 0.0053 |
|                                          |       | Maternal biomarker                    | 0.012 (-0.013, 0.037)        | 0.343           |     |                       |        |
|                                          |       | Weight-for-length Z-score at birth    | 0.059 (0.027, 0.091)         | 0.001           |     |                       |        |
|                                          | 4     | Intervention (MM vs IFA)              | 0.016 (-0.047, 0.079)        | 0.604           | 278 | 0.0335                | 0.0237 |
|                                          |       | Maternal biomarker                    | 0.020 (-0.005, 0.045)        | 0.119           |     |                       |        |
|                                          |       | Cord blood AGP, $\log_{10}\text{g/L}$ | 0.163 (0.011, 0.315)         | 0.036           |     |                       |        |
| $\alpha$ -Tocopherol, $\mu\text{mol/L}$  | 1     | Intervention (MM vs IFA)              | 0.249 (-0.351, 0.837)        | 0.410           | 278 | 0.0906                | 0.0005 |
|                                          |       | Maternal biomarker                    | 0.470 (0.143, 0.796)         | 0.006           |     |                       |        |
|                                          |       | Cord blood AGP, $\log_{10}\text{g/L}$ | 1.55 (0.338, 2.762)          | 0.014           |     |                       |        |
| fT4, $\text{pmol/L}$                     | 1     | Intervention (MM vs IFA)              | -0.083 (-0.470, 0.304)       | 0.664           | 227 | 0.0798                | 0.0197 |
|                                          |       | Maternal biomarker                    | 0.099 (-0.140, 0.338)        | 0.403           |     |                       |        |
|                                          |       | Maternal biomarker (early pregnancy)  | 0.121 (0.037, 0.205)         | 0.006           |     |                       |        |

<sup>1</sup>Maternal biomarkers are from 32 weeks gestation unless otherwise noted and distributions were standardized.

<sup>2</sup>Newborn weight (kg) and length (cm) were also positively—and newborn underweight (weight-for-age Z-score <-2), stunting (length-for-age Z-score <-2), and wasting (weight-for-length Z-score<-2) were also negatively—associated with cord retinol concentrations, *P*<0.05.

AGP,  $\alpha$ 1-acid glycoprotein; fT4, free thyroxine; IFA, iron folic acid; MM, multiple micronutrients; 25(OH)D, 25-hydroxyvitamin D.
